# Supplementary material for: Nanoporous gold electrodes modified with self-assembled monolayers for electrochemical control of the surface charge
Source: Royal Society of Chemistry journal article supplement (doi:10.1039/d1cp01491a), 2021-01-01
Supplement: d1cp01491a1.pdf [file d1cp01491a1.pdf]

## Electronic Supplementary Information

### Nanoporous Gold Electrodes Modified with Self-Assembled Monolayers for Electrochemical Control of the Surface Charge

Elisabeth Hengge<sup>1z</sup>, Markus Hirber<sup>1</sup>, Philipp Brunner<sup>1</sup>, Eva-Maria Steyskal<sup>1</sup>, Bernd Nidetzky<sup>2</sup>, Roland Würschum<sup>1</sup>

<sup>1</sup>Institute of Materials Physics, Graz University of Technology, Petersgasse 16, A-8010 Graz, Austria <sup>2</sup>Institute of Biotechnology and Biochemical Engineering, Graz University of Technology, Petersgasse 12, A-8010 Graz, Austria

<sup>z</sup> e.hengge@tugraz.at

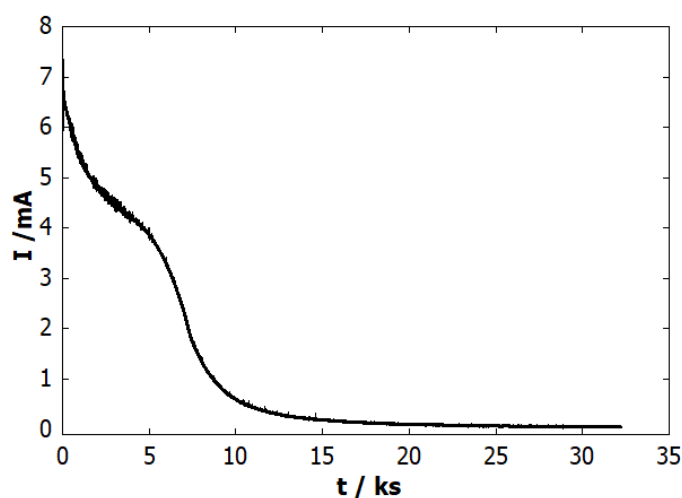

Figure ESI-1: Current vs. time evolution during dealloying of an AuAg alloy. Cutoff threshold was  $50\mu\text{A}$ .

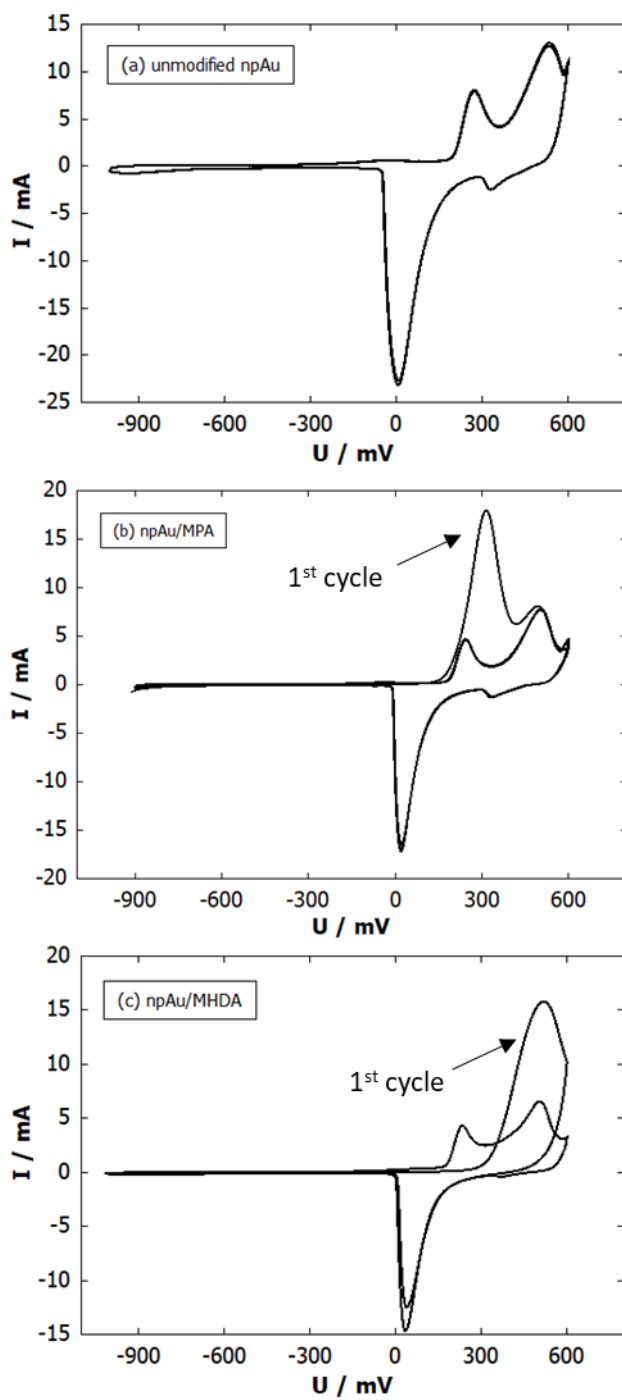

Figure ESI-2: Cyclic voltammetry of npAu (a), npAu/MPA (b) and npAu/MHDA (c) in 1M KOH at 1 mV/s after determination of pzc in 10mM HClO<sub>4</sub>. (b) and (c) clearly show the oxidation (desorption) of the SAM in the first cycle.
